# Supplementary material for: Dual design of electrodes and electrolytes ensures flexible symmetric micro-supercapacitors with high energy density
Source: Royal Society of Chemistry journal article supplement (doi:10.1039/d4ta02145b), 2024-01-01
Supplement: d4ta02145b1.pdf [file d4ta02145b1.pdf]

## Supporting Information

### **Dual design of electrode and electrolyte ensures flexible symmetric micro-supercapacitors with high energy density**

Zhiqian Cao<sup>a,\*</sup>, Jingzhi Tao<sup>a</sup>, Yudong Wu<sup>b,\*</sup>

<sup>a</sup> Key Laboratory of Green and Precise Synthetic Chemistry and Applications, Ministry of Education, School of Chemistry and Materials Science, Huaibei Normal University, Huaibei, P. R. China.

<sup>b</sup> School of Materials Science and Engineering, Key Laboratory of Structure and Functional Regulation of Hybrid Materials, Ministry of education, Anhui University, Hefei 230601, P. R. China.

## **Experimental Section**

### **The synthesis of MXene nanosheets**

Typically, the etching solution was prepared by adding 2.0 g LiF to 20 mL HCl (6 mol/L). Next, 1.0 g  $\text{Ti}_3\text{AlC}_2$  MAX powder was added to the above etching solution. The mixed solution was stirred at 40 °C for 48 hours. The centrifuged product was then washed with deionised (DI) water to pH=7. After then, a multilayer  $\text{Ti}_3\text{C}_2\text{T}_x$  powder was obtained after drying. 0.3 g multilayer  $\text{Ti}_3\text{C}_2\text{T}_x$  powder was added into 100 mL DI water. After ultrasonic treatment for 0.5 h at 4 °C, the unstripped multilayer  $\text{Ti}_3\text{C}_2\text{T}_x$  were removed via centrifugation (4000 rpm/5 minutes). Finally, a colloidal solution containing 2D MXene nanosheets (2 mg/mL) was obtained.

### **The preparation of ZV-AgNP-MXene film electrodes**

The ZV-AgNP-MXene film was prepared using an efficient self-reducing process of silver nitrate ( $\text{AgNO}_3$ ) in MXene colloidal solution. Firstly,  $\text{AgNO}_3$  (15 mg) was dissolved into 10 mL DI water. Then, 20 mL of MXene colloidal solution (2 mg/mL) was added to the above solution and stirred for 30 minutes. The ZV-AgNP-MXene film was then obtained by filtering the above mixed solution, which was further peeled off from the filter membrane and dried for 24 hours. The Ag content of ZV-Ag-NP-MXene film is about 19% (MXene: Ag nanoparticle=40 mg: 9.5 mg). In addition, pure MXene films and highly loaded ZV-AgNP-MXene (HD-Ag-NP-MXene: ~28% Ag content) films were also prepared using the same procedure.

### **The preparation of PAM/1M $\text{Na}_2\text{SO}_4$ hydrogel electrolytes**

3.0 g acrylamide (AM) was first dissolved in 20 mL  $\text{Na}_2\text{SO}_4$  (1 mol/L) solution under stirring. After being deoxygenated for 30 minutes with nitrogen gas, 0.01 g initiator ammonium persulfate was added and stirred rapidly for 10 s. Finally, after heating at 80°C for 2 h, polyacrylamide (PAM)/ $\text{Na}_2\text{SO}_4$  gel electrolyte was obtained.

### The assembly of flexible AS-MSCs devices

Firstly, the interdigital electrodes were fabricated via laser-engraving the above obtained MXene and ZV-AgNP-MXene film electrodes. Then, the obtained MXene and ZV-AgNP-MXene interdigital electrodes were taped with double faced adhesive onto a silicone elastomer substrate (Ecoflex 00-30). After coating the obtained PAM/Na<sub>2</sub>SO<sub>4</sub> hydrogel on the electrodes as the top solid electrolyte for both the ionic conductor, the AS-MSCs can be obtained. After that, the AS-MSC device units are interconnected by copper foils and further encapsulated with semi-cured silicone resin (Ecoflex 00-30, two-component mixture at the ratio of 1:1 by weight). After further curing at 45 °C for 1 h, the packaged flexible AS-MSCs devices are finally fabricated.

### Electrochemical measurements.

Cyclic voltammetry (CV), galvanostatic charge-discharge (GCD), and electrochemical impedance spectroscopy (EIS) measurements were conducted using an electrochemical workstation (CHI 660E, Chenhua). The areal capacitance ( $C_s$ , mF cm<sup>-2</sup>) and energy density ( $W_s$ , μWh cm<sup>-2</sup>) were calculated based on the GCD curves according to the following equations:

$$C = Q / \Delta E = I \Delta t / \Delta E \quad (1)$$

$$C_s = C / S = I \Delta t / S \Delta E \quad (2)$$

$$W_s = 0.5 C (\Delta E)^2 / 3600 s \quad (3)$$

Where  $C$ ,  $Q$ ,  $I$ ,  $\Delta t$  represents the total capacitance, total charge, discharge current, and discharge time, respectively.  $\Delta E$  is the potential window during the discharge process after  $IR$  drop, and  $S$  is the total area of the film electrodes.

### Material Characterizations.

The microstructure and phase composition of the film samples were characterized by field-emission scanning electron microscopy (FE-SEM, S-8200, Hitachi, Japan), transmission electron microscopy (TEM, JEM-2100, JEOL, Japan), X-ray diffractometer (XRD, Bruker D8-ADVANCE), in-situ Raman spectroscopy (RXNI-785, RAMAN RXN SYSTEMS, Kaiser), and X-ray photoelectron spectroscopy (XPS, Mg  $K_{\alpha}$  achromatic X-ray source).

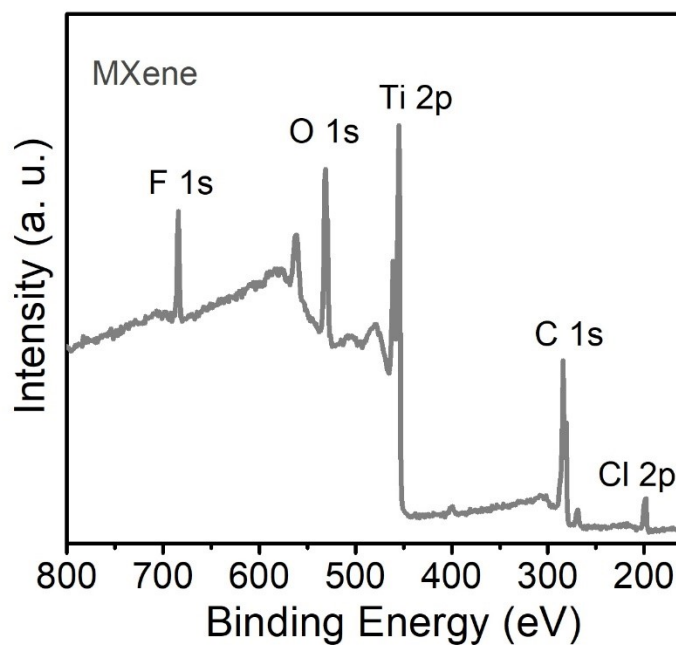

**Fig. S1** XPS patterns of MXene film.

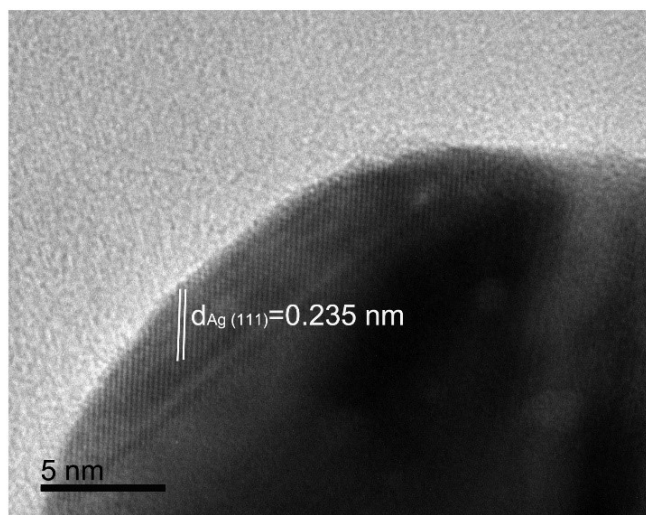

**Fig. S2** HRTEM images of ZV-AgNP-MXene nanosheets.

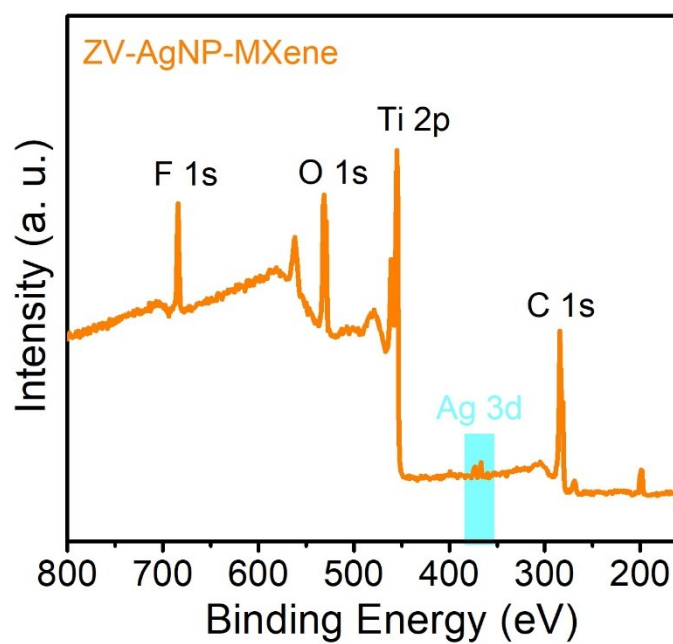

**Fig. S3** XPS patterns of ZV-AgNP-MXene film.

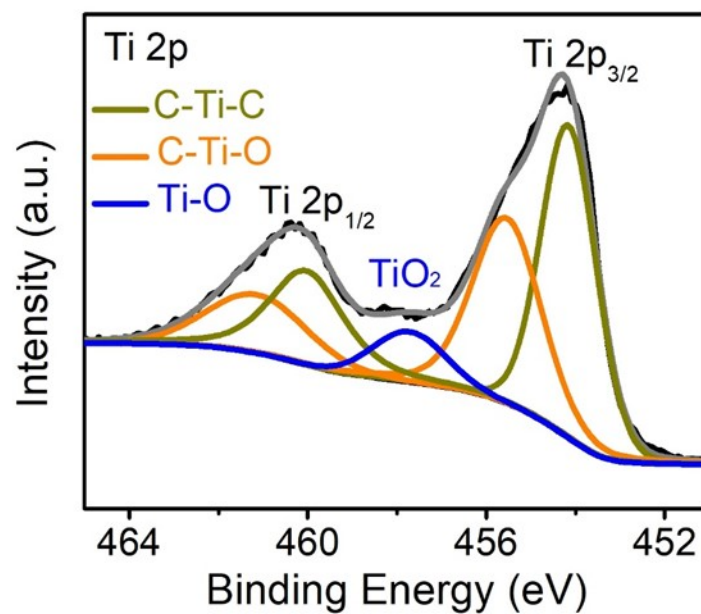

**Fig. S4** High-resolution XPS spectra of Ti 2p of ZV-AgNP-MXene film.

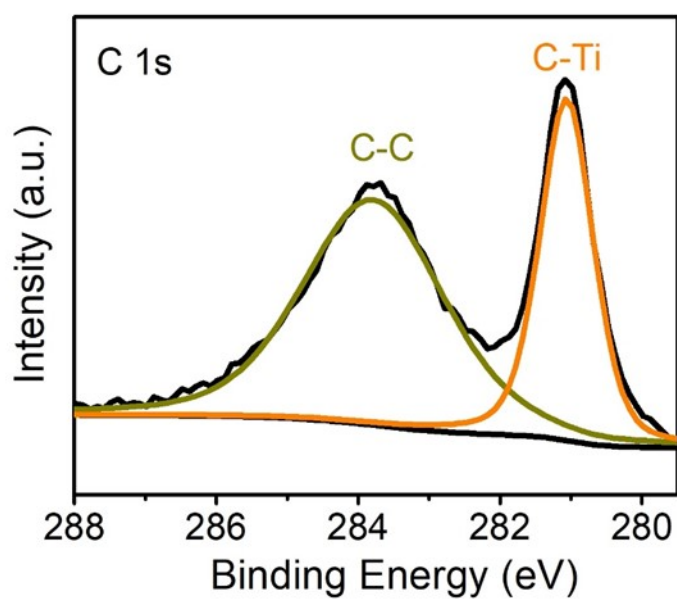

**Fig. S5** High-resolution XPS spectra of C 1s of ZV-AgNP-MXene film.

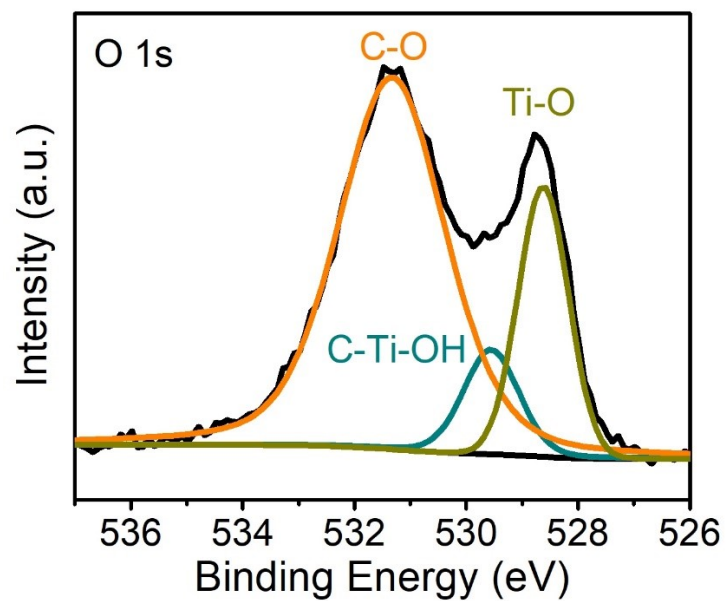

**Fig. S6** High-resolution XPS spectra of O 1s of ZV-AgNP-MXene film.

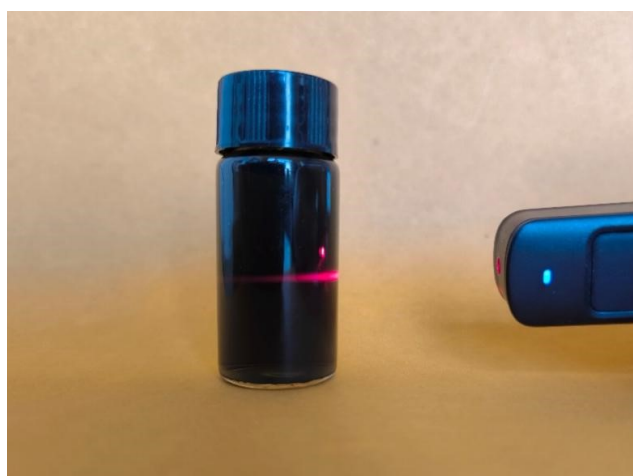

**Fig. S7** Photograph of the colloidal solution containing ZV-AgNP-MXene nanoflakes.

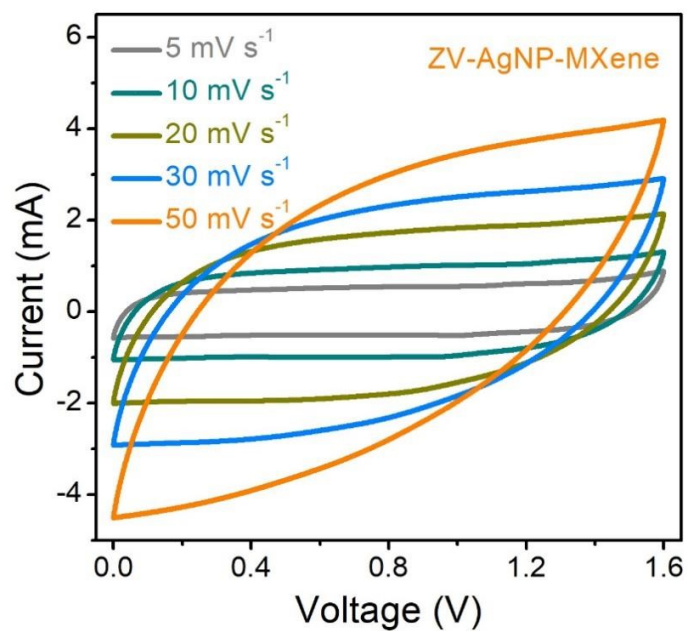

**Fig. S8** CV curves of the AS-MSCs based on ZV-AgNP-MXene film electrodes at different scanning rate.

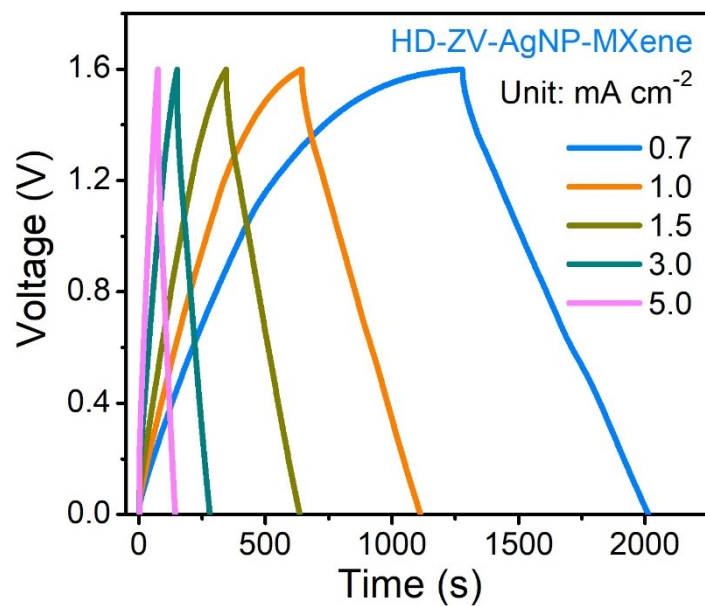

**Fig. S9** GCD profiles of the AS-MSCs based on HD-ZV-AgNP-MXene film electrodes at different current densities.



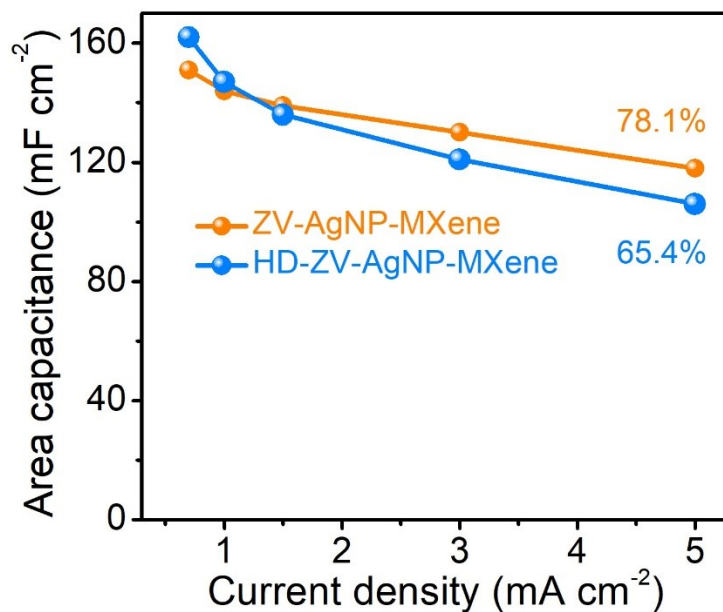

**Fig. S10** The areal capacitance of AS-MSCs based on HD-ZV-AgNP-MXene and ZV-AgNP-MXene film electrodes.

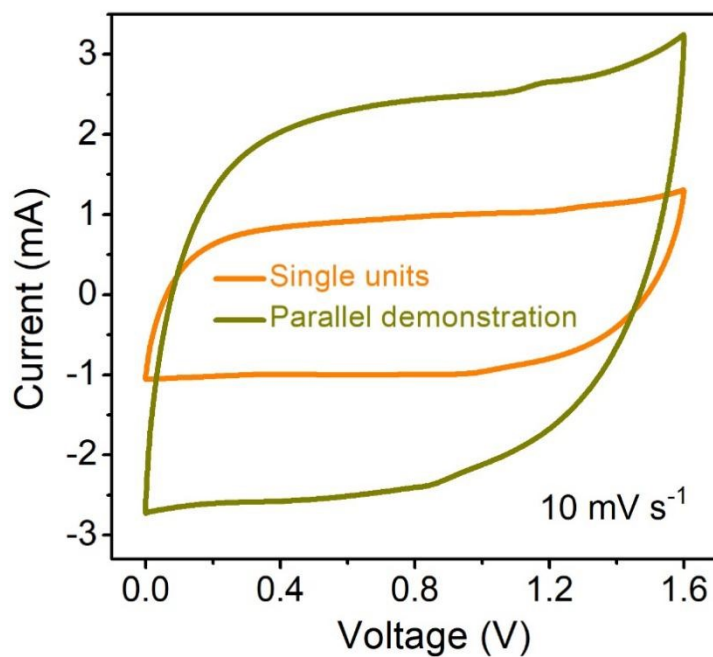

**Fig. S11** CV curves of single AS-MSCs unit and parallel-connected AS-MSCs devices.

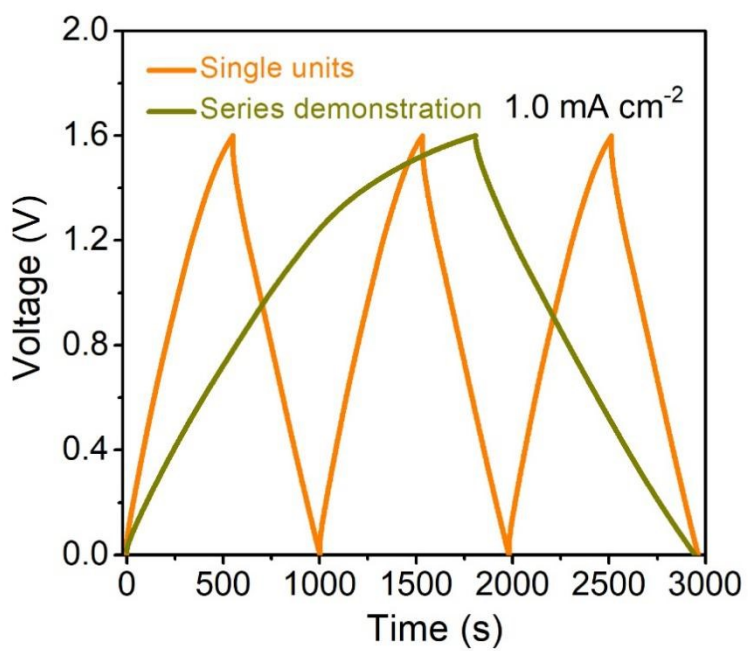

**Fig. S12** GCD profiles of single AS-MSCs unit and parallel-connected AS-MSCs devices.

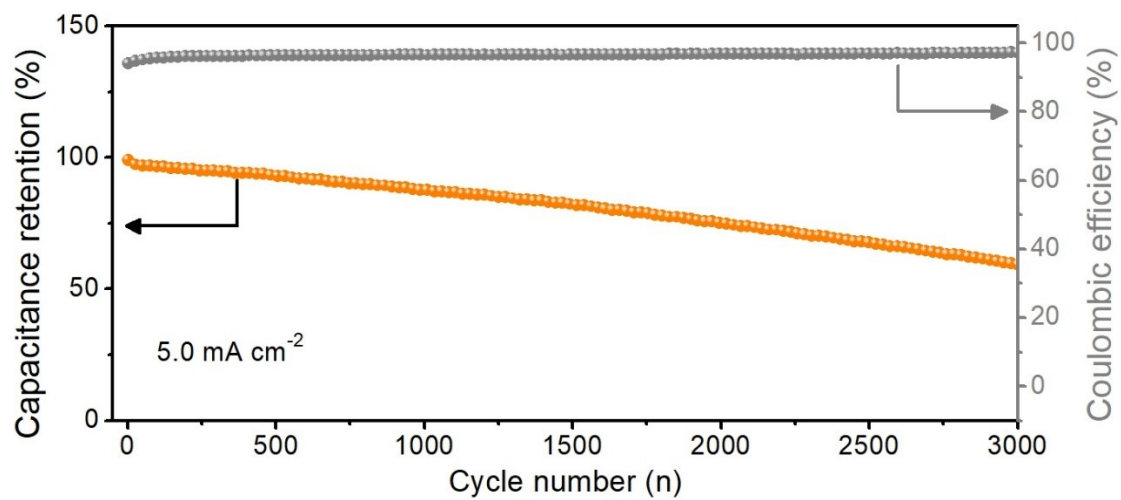

**Fig. S13** Cycling stability of series-connected AS-MSCs devices.
